# Supplementary material for: A proxy for atmospheric daytime gaseous sulfuric acid concentration in urban Beijing
Source: Copernicus journal article supplement (doi:10.5194/acp-2018-1132), 2018-11-29
Supplement: Supplementary file 1 [file acp-2018-1132-supplement.pdf]

## Supplement for

### **A proxy for atmospheric daytime gaseous sulfuric acid concentration in urban Beijing**

Yiqun Lu<sup>1</sup>, Chao Yan<sup>2</sup>, Yueyun Fu<sup>3</sup>, Yan Chen<sup>4</sup>, Yiliang Liu<sup>1</sup>, Gan Yang<sup>1</sup>, Yuwei Wang<sup>1</sup>, Federico Bianchi<sup>2</sup>, Biwu Chu<sup>2</sup>, Ying Zhou<sup>5</sup>, Rujing Yin<sup>3</sup>, Rima Baalbaki<sup>2</sup>, Olga Garmash<sup>2</sup>, Chenjuan Deng<sup>3</sup>, Weigang Wang<sup>4</sup>, Yongchun Liu<sup>5</sup>, Tuukka Petäjä<sup>2,5,6</sup>, Veli-Matti Kerminen<sup>2</sup>, Jingkun Jiang<sup>3</sup>, Markku Kulmala<sup>2,5</sup>, Lin Wang<sup>1,7,8\*</sup>

<sup>1</sup> Shanghai Key Laboratory of Atmospheric Particle Pollution and Prevention (LAP<sup>3</sup>), Department of Environmental Science & Engineering, Jiangwan Campus, Fudan University, Shanghai 200438, China

<sup>2</sup> Institute for Atmospheric and Earth System Research / Physics, Faculty of Science, University of Helsinki, 00014 Helsinki, Finland

<sup>3</sup> State Key Joint Laboratory of Environment Simulation and Pollution Control, School of Environment, Tsinghua University, Beijing 100084, China

<sup>4</sup> Institute of Chemistry, Chinese Academy of Sciences, Beijing 100190, China

<sup>5</sup> Aerosol and Haze Laboratory, Advanced Innovation Center for Soft Matter Science and Engineering, Beijing University of Chemical Technology, Beijing 100029, China

<sup>6</sup> Joint International Research Laboratory of Atmospheric and Earth System Sciences (JirLATEST), School of Atmospheric Sciences, Nanjing University, Nanjing 210023, China

<sup>7</sup> Institute of Atmospheric Sciences, Jiangwan Campus, Fudan University, Shanghai 200438, China

<sup>8</sup> Shanghai Institute of Pollution Control and Ecological Security, Shanghai 200092, China

\* *Corresponding Author: L.W., email, lin\_wang@fudan.edu.cn; phone, +86-21-31243568.*

This supplementary information document contains seven figures, totaling 5 pages.

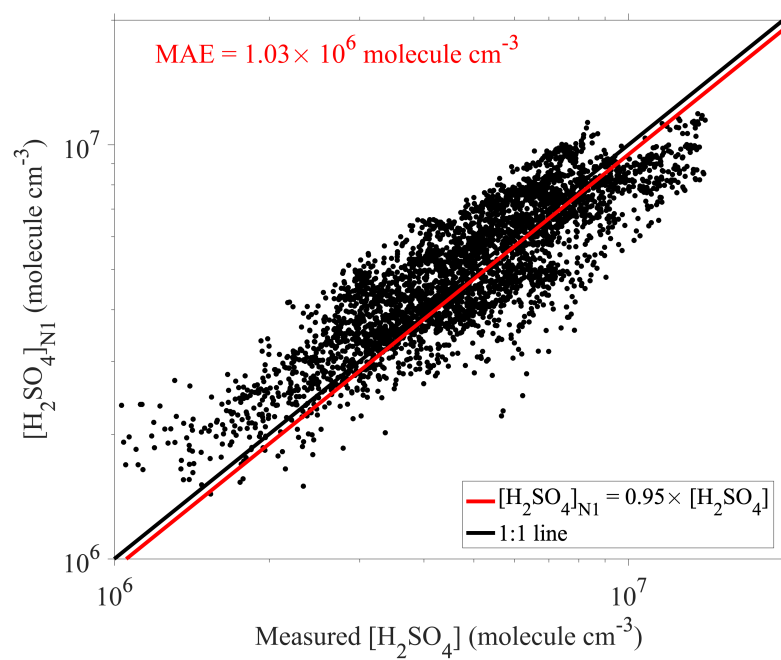

**Figure S1a**

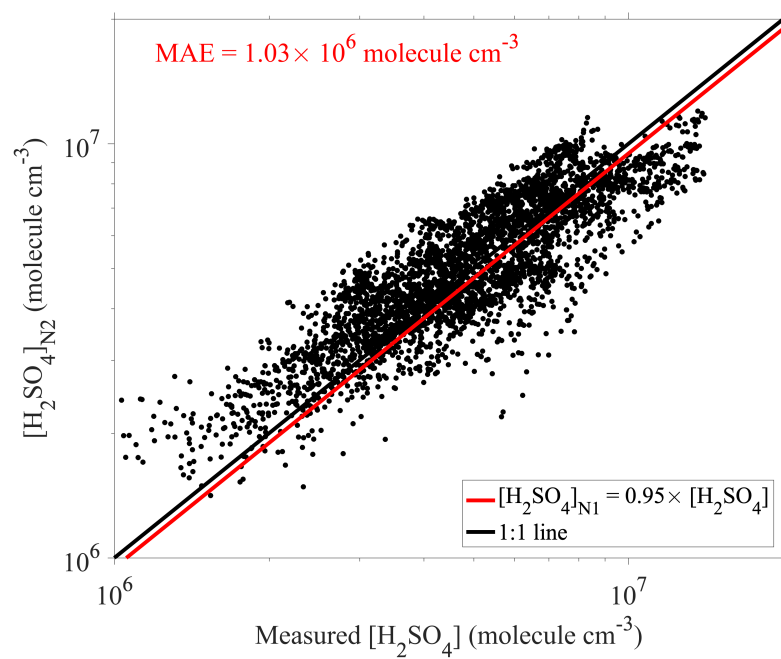

**Figure S1b**

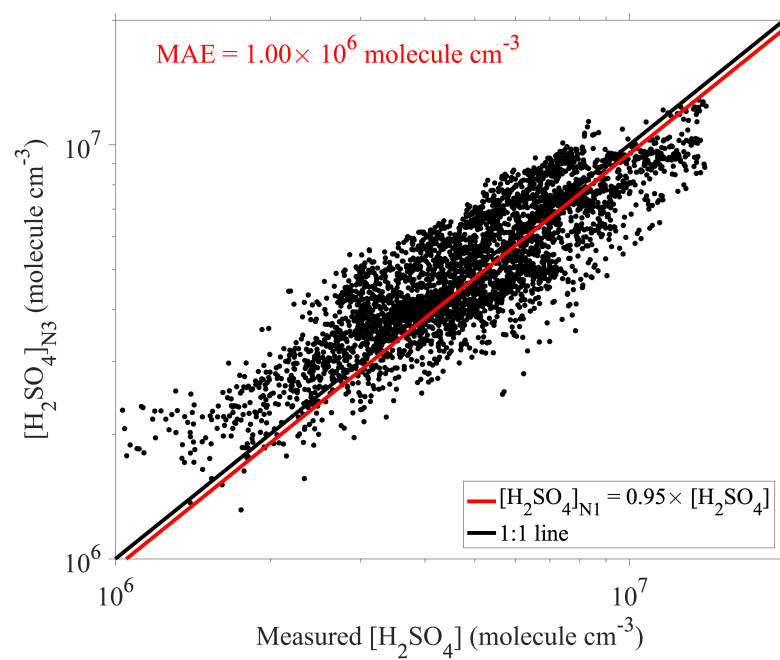

**Figure S1c**

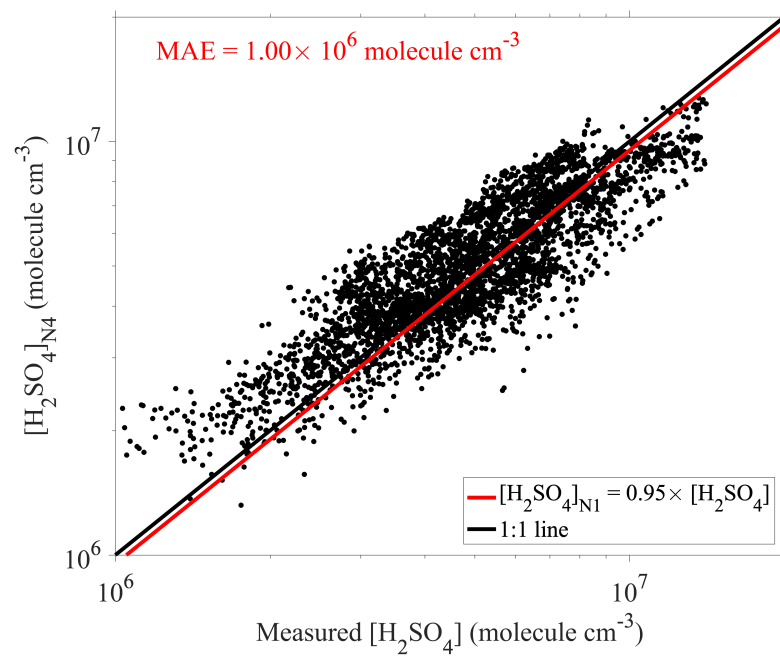

**Figure S1d**

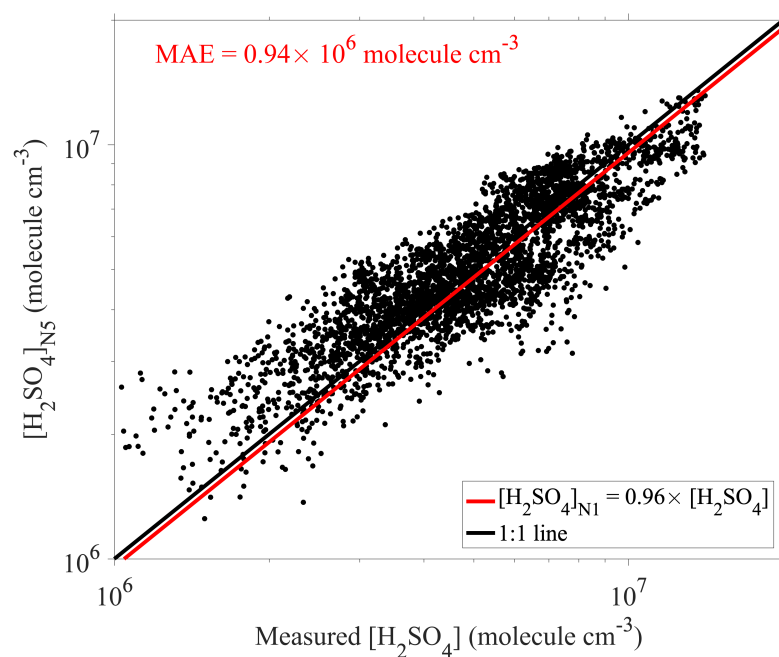

**Figure S1e**

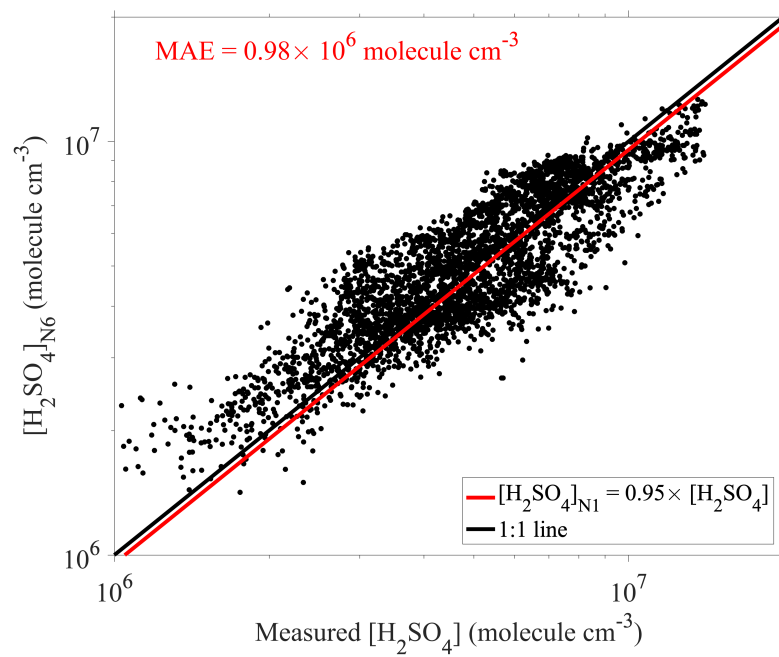

**Figure S1f**

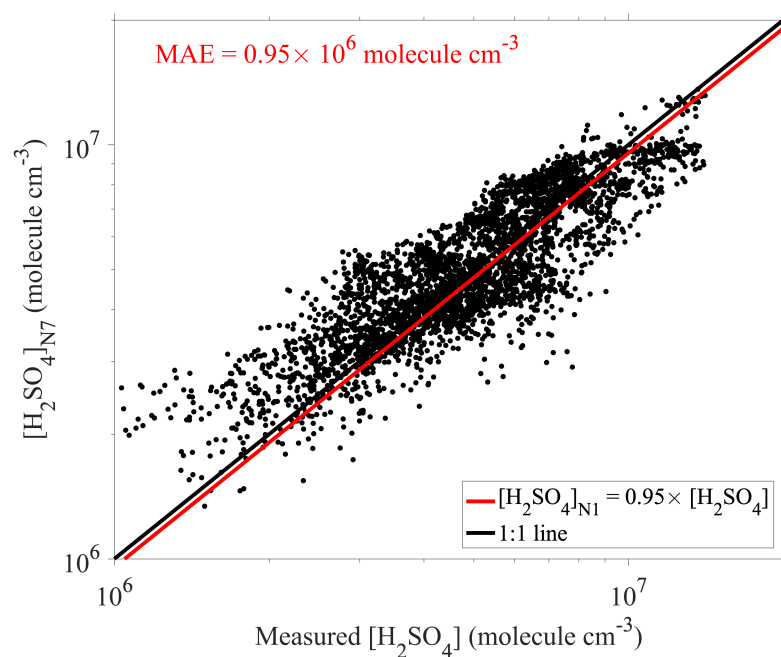

**Figure S1g**

**Figure S1.** (a-g) Correlations between measured  $[\text{H}_2\text{SO}_4]$  and predicted values given by proxies N1-N7, respectively. The black line represents a 1:1 plot. The red line represents a linear fit between  $[\text{H}_2\text{SO}_4]_{\text{Ni}}$  and measured  $[\text{H}_2\text{SO}_4]$  with a zero intercept.
